# Supplementary material for: A natural polymorphism of Mycobacterium tuberculosis in the esxH gene disrupts immunodomination by the TB10.4-specific CD8 T cell response
Source: PubMed Central journal article supplement (PMC7597557; doi:10.1371/journal.ppat.1009000), 2020-10-19

A.

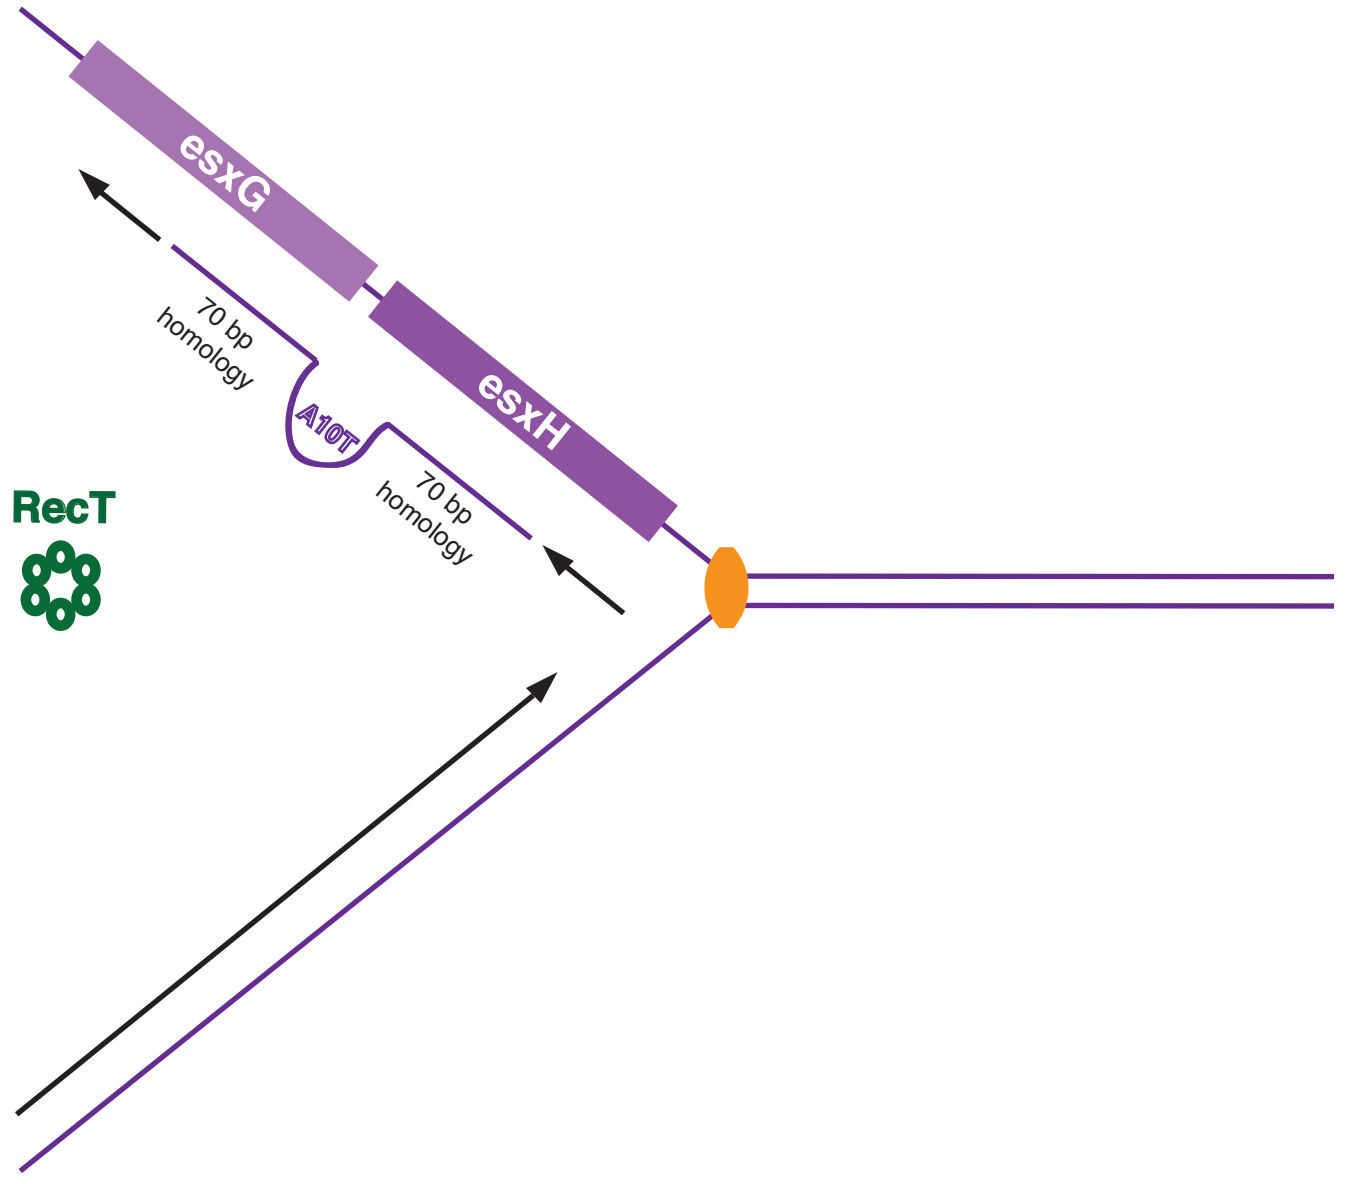

B.

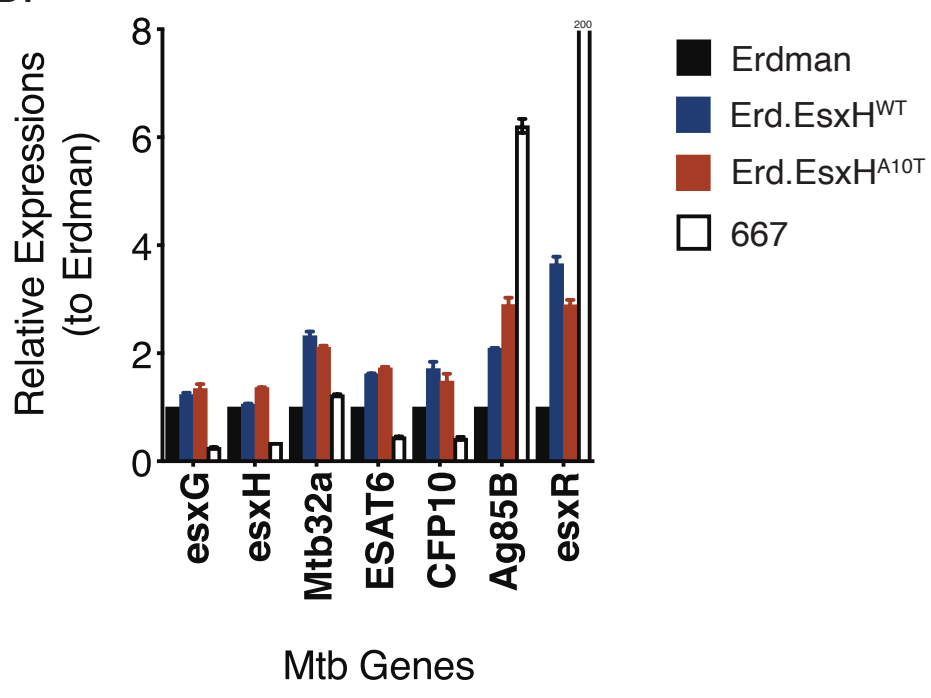

Supplement: ppat.1009000.s005.pdf [file ppat.1009000.s005.pdf]
