# Supplementary material for: A natural polymorphism of Mycobacterium tuberculosis in the esxH gene disrupts immunodomination by the TB10.4-specific CD8 T cell response
Source: PubMed Central journal article supplement (PMC7597557; doi:10.1371/journal.ppat.1009000), 2020-10-19
Supplement: ppat.1009000.s009.pdf [file ppat.1009000.s009.pdf]

### Peptide binding to H-2 K<sup>b</sup>

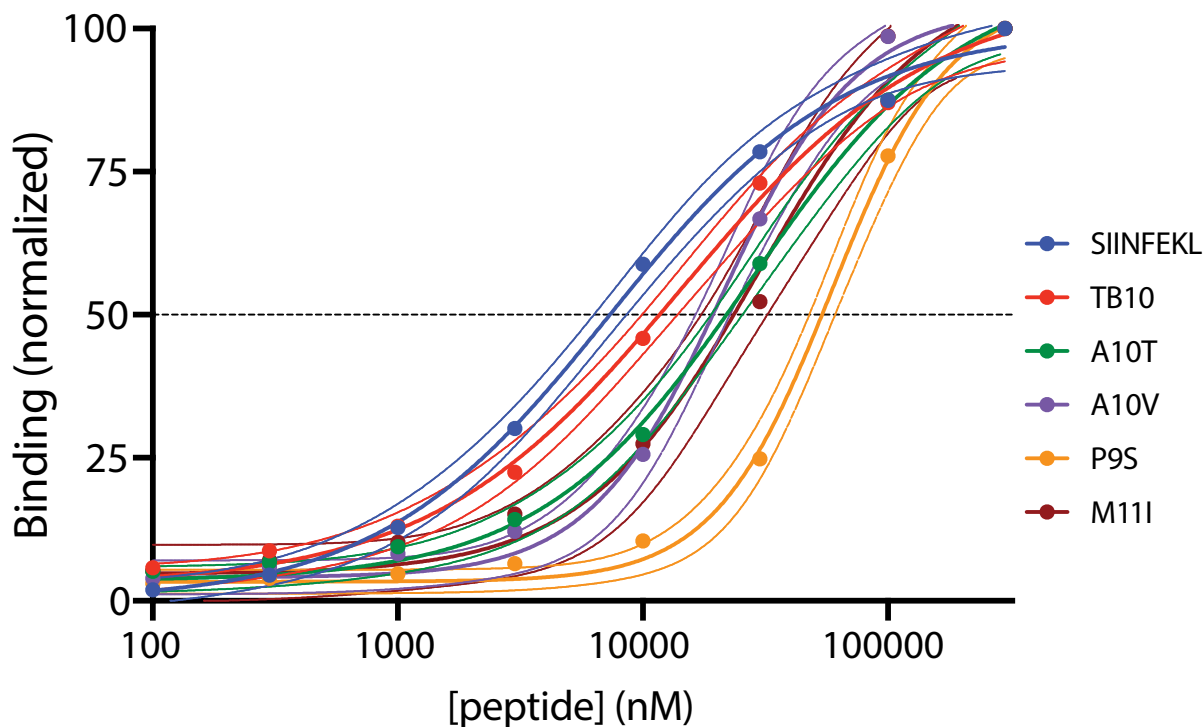

|                                          | SIINFEKL | TB10    | A10T    | A10V    | P9S     | M11I    | IMANAPAM  |
|------------------------------------------|----------|---------|---------|---------|---------|---------|-----------|
| [Agonist] vs. response - Find ECanything |          |         |         |         |         |         | Ambiguous |
| Best-fit values                          |          |         |         |         |         |         |           |
| ECF                                      | 7318     | 14363   | 28078   | 21278   | 59349   | 29705   | ~ 115602  |
| F                                        | = 50.00  | = 50.00 | = 50.00 | = 50.00 | = 50.00 | = 50.00 | = 50.00   |
| HillSlope                                | 0.9188   | 0.8498  | 1.008   | 1.593   | 1.807   | 1.222   | ~ 8.816   |
| Bottom                                   | -0.1011  | 2.707   | 3.466   | 4.088   | 3.341   | 4.703   | 15.19     |
| Top                                      | 99.97    | 106.3   | 109.7   | 103.6   | 105.6   | 110.3   | 100       |
| logECF                                   | 3.864    | 4.157   | 4.448   | 4.328   | 4.773   | 4.473   | ~ 5.063   |
| Span                                     | 100.1    | 103.6   | 106.2   | 99.56   | 102.3   | 105.6   | 84.83     |
| Goodness of Fit                          |          |         |         |         |         |         |           |
| Degrees of Freedom                       | 7        | 7       | 7       | 7       | 7       | 7       | 7         |
| R squared                                | 0.9979   | 0.9974  | 0.9973  | 0.9956  | 0.9967  | 0.987   | 0.8943    |
| Sum of Squares                           | 32.71    | 36.56   | 35.27   | 67.72   | 39.22   | 185.8   | 775.6     |
| Sy.x                                     | 2.162    | 2.285   | 2.245   | 3.11    | 2.367   | 5.152   | 10.53     |
| Constraints                              |          |         |         |         |         |         |           |
| F                                        | F = 50   | F = 50  | F = 50  | F = 50  | F = 50  | F = 50  | F = 50    |
| Number of points                         |          |         |         |         |         |         |           |
| # of X values                            | 11       | 11      | 11      | 11      | 11      | 11      | 11        |
| # Y values analyzed                      | 11       | 11      | 11      | 11      | 11      | 11      | 11        |
