# Supplementary material for: A natural polymorphism of Mycobacterium tuberculosis in the esxH gene disrupts immunodomination by the TB10.4-specific CD8 T cell response
Source: PubMed Central journal article supplement (PMC7597557; doi:10.1371/journal.ppat.1009000), 2020-10-19
Supplement: ppat.1009000.s011.pdf [file ppat.1009000.s011.pdf]

**Table S1:** Identification of *esxH* nonsynonymous polymorphisms among clinical isolates. The number of each polymorphism was indicated among different Mtb lineages with the number of independent occurrences of each polymorphism in parentheses.

| Polymorphisms | Lineage 1                        | Lineage 2 | Lineage 3 | Lineage 4 |
|---------------|----------------------------------|-----------|-----------|-----------|
|               | Number Isolates (Number evolved) |           |           |           |
| N7D           | 2 (1)                            |           |           |           |
| N6S           | 2 (1)                            |           |           |           |
| P9S           | 17 (1)                           |           |           |           |
| A10P          | 1 (1)                            |           |           |           |
| A10T          | 41 (1)                           |           |           |           |
| A10V          | 6 (3)                            | 1 (1)     |           | 4 (1)     |
| M11L          | 1 (1)                            |           |           |           |
| L12F          | 1 (1)                            |           |           |           |
| G13D          | 1 (1)                            |           |           |           |
| T24K          |                                  | 1 (1)     |           |           |
| Q57L          | 1 (1)                            |           |           |           |
| A61V          | 1 (1)                            |           |           |           |
| H70Y          | 1 (1) <sup>a</sup>               |           |           | 1 (1)     |
| S74R          | 4 (1) <sup>b</sup>               | 1 (1)     |           |           |
| T75A          |                                  | 1 (1)     |           |           |
| T75S          |                                  |           |           | 1 (1)     |
| H76L          | 1 (1)                            |           |           |           |
| A89S          |                                  |           |           | 1 (1)     |
|               |                                  |           |           |           |
| Total         | 75/594                           | 4/1239    | 0/529     | 7/1001    |
| Percent       | 12.6%                            | 0.3%      | 0.0%      | 0.7%      |

<sup>a</sup>Also A10V mutant

<sup>b</sup>Also A10T mutants
