# Supplementary material for: A natural polymorphism of Mycobacterium tuberculosis in the esxH gene disrupts immunodomination by the TB10.4-specific CD8 T cell response
Source: PubMed Central journal article supplement (PMC7597557; doi:10.1371/journal.ppat.1009000), 2020-10-19
Supplement: ppat.1009000.s012.pdf [file ppat.1009000.s012.pdf]

**Table S2:** Peptide sequences used in this study.

| Peptides         | Sequences        |
|------------------|------------------|
| TB10             | IMYNYPAM         |
| A10T             | IMYNYPTM         |
| A10V             | IMYNYPVM         |
| P9S              | IMYNYSAM         |
| M11I             | IMYNYPAI         |
| Nonbinder        | IMANAPAM         |
| Positive         | SIINFEKL         |
| TB10.4: 1 of 21  | MSQIMYNYPAMLGHA  |
| TB10.4: 2 of 21  | MYNYPAMLGHAGDMA  |
| TB10.4: 3 of 21  | PAMLGHAGDMAGYAG  |
| TB10.4: 4 of 21  | GHAGDMAGYAGTLQS  |
| TB10.4: 5 of 21  | DMAGYAGTLQSLGAE  |
| TB10.4: 6 of 21  | YAGTLQSLGAEIAVE  |
| TB10.4: 7 of 21  | LQSLGAEIAVEQAAL  |
| TB10.4: 8 of 21  | GAEIAVEQAALQSAW  |
| TB10.4: 9 of 21  | AVEQAALQSAWQGDT  |
| TB10.4: 10 of 21 | AALQSAWQGDTGITY  |
| TB10.4: 11 of 21 | SAWQGDTGITYQAWQ  |
| TB10.4: 12 of 21 | GDTGITYQAWQAQWN  |
| TB10.4: 13 of 21 | ITYQAWQAQWNQAME  |
| TB10.4: 14 of 21 | AWQAQWNQAMEDLVR  |
| TB10.4: 15 of 21 | QWNQAMEDLVRAYHA  |
| TB10.4: 16 of 21 | AMEDLVRAYHAMSST  |
| TB10.4: 17 of 21 | LVRAYHAMSSTHEAN  |
| TB10.4: 18 of 21 | YHAMSSTHEANTMAM  |
| TB10.4: 19 of 21 | SSTHEANTMAMMARD  |
| TB10.4: 20 of 21 | EANTMAMMARDTAEA  |
| TB10.4: 21 of 21 | MAMMARDTAEAAKWGG |
| MTB32a 309-318   | GAPINSATAM       |
| ESAT6 1-15       | MTEQQWNFAGIEAAA  |
| TB10.4 20-28     | GYAGTLQSL        |
| TB10.4 74-88     | STHEANTMAMMARDT  |
| EspA 150-158     | AYLVVKTLI        |
