# Supplementary material for: A natural polymorphism of Mycobacterium tuberculosis in the esxH gene disrupts immunodomination by the TB10.4-specific CD8 T cell response
Source: PubMed Central journal article supplement (PMC7597557; doi:10.1371/journal.ppat.1009000), 2020-10-19
Supplement: ppat.1009000.s013.pdf [file ppat.1009000.s013.pdf]

**Table S3:** Predicted processing efficiency and binding affinity to H2-K<sup>b</sup> of polymorphic TB10.4<sub>4-11</sub> epitopes. Bold letters indicate polymorphic substitution

| Variants  | 15mer                             | epitope                    | Proteasome score | TAP score | MHC score | Processing score | Total score | MHC ic50 |
|-----------|-----------------------------------|----------------------------|------------------|-----------|-----------|------------------|-------------|----------|
| WT        | IMYNY <b>P</b> AMLGHAGDM          | IMYNY <b>P</b> AM          | 0.94             | 0.23      | -0.87     | 1.17             | 0.30        | 7.4      |
| P9S       | IMYNY <b>S</b> AMLGHAGDM          | IMYNY <b>S</b> AM          | 0.82             | 0.23      | -0.75     | 1.05             | 0.30        | 5.6      |
| A10T      | IMYNY <b>P</b> TMLGHAGDM          | IMYNY <b>P</b> TM          | 1.07             | 0.23      | -0.81     | 1.30             | 0.49        | 6.5      |
| A10V      | IMYNY <b>P</b> VMLGHAGDM          | IMYNY <b>P</b> VM          | 1.09             | 0.23      | -0.98     | 1.32             | 0.35        | 9.5      |
| M11I      | IMYNY <b>P</b> AILGHAGDM          | IMYNY <b>P</b> AI          | 1.07             | 0.33      | -0.88     | 1.40             | 0.52        | 7.6      |
| Nonbinder | IM <b>A</b> N <b>A</b> PAMLGHAGDM | IM <b>A</b> N <b>A</b> PAM | 0.94             | 0.15      | -3.13     | 1.10             | -2.04       | 1356.5   |
